# Supplementary material
Source: PubMed Central journal article supplement (PMC6201734)
Supplement: supp_6.4.E453_2018-0164-1-at.pdf [file supp_6.4.E453_2018-0164-1-at.pdf]

**Appendix 1 (as supplied by the authors):** Single-case analyses of the UFOV-2 and UFOV-3 scores of the participants who did not complete the study (drop-outs)

| Participant | Sequence | Session tested | UFOV-2  |                          |                       |            | UFOV-3  |                          |                       |            |
|-------------|----------|----------------|---------|--------------------------|-----------------------|------------|---------|--------------------------|-----------------------|------------|
|             |          |                | t-value | <i>p</i> -value 2-tailed | Z score (effect size) | 95% CI     | t-value | <i>p</i> -value 2-tailed | Z score (effect size) | 95% CI     |
| 2           | 4        | 5hrs post      | 2.86    | 0.016                    | 2.98                  | 1.55-4.39  | -0.61   | 0.55                     | -0.64                 | -1.28-0.02 |
| 14          | 1        | No cannabis    | -0.14   | 0.89                     | -0.14                 | -0.73-0.45 | -0.01   | 0.98                     | -0.01                 | -0.60-0.57 |
| 14          | 1        | 1hr post       | -0.11   | 0.91                     | -0.12                 | -0.71-0.47 | 1.10    | 0.29                     | 1.15                  | 0.36-1.90  |
| 33          | 2        | 3hrs post      | -0.54   | 0.59                     | -0.57                 | -1.17-0.05 | -0.42   | 0.67                     | -0.44                 | -1.02-0.16 |
