# Supplementary material
Source: PubMed Central journal article supplement (PMC6201734)
Supplement: supp_6.4.E453_2018-0164-3-at.pdf [file supp_6.4.E453_2018-0164-3-at.pdf]

**Appendix 3 (as supplied by the authors):** Overall performance-related crash risk according to cannabis state

*See chart on page 2*

(1) Performance-related crash risk:

“+ **crash and ↓ accuracy**” = when a participant fits **all** of the following characteristics: intersection crossing safety <100%; obstacle avoidance crash rate >0%; vigilance accuracy <100%; and obstacle avoidance accuracy <100%.

“∅ **crash and ↑ accuracy**” = when a participant fits **all** of the following characteristics: intersection crossing safety =100%; obstacle avoidance crash rate =0%; vigilance accuracy=100%; and obstacle avoidance accuracy=100%.

(2) “b” and “c” cells represent discordance between no cannabis and cannabis state performance. E.g., in performance-related crash risk, 37.2% of participants who had no crashes & high accuracy at no-cannabis state – present with crashes and low accuracy post-cannabis use; suggesting that the use of cannabis worsens performance.

(3) If at 1hr, 3hrs and 5hrs post-use the participant was categorized as + for crash, they would only account for n=1 as + for crash in the “Cannabis-use sessions combined”.

(4) Some cells have n<45 because of missing data.

**LEGEND:**  $\chi^2$ : McNemar Test for matched nominal pairs; OR: odds ratio; RR: relative risk; CI: confidence interval. Bonferroni correction was applied and only  $p$  values <.01 were considered as significant; + refers to one having crashes on the simulator tasks; ∅ refers to having no crashes on the stimulator tasks; ↑ refers to high accuracy/optimal; ↓ refers to low accuracy/suboptimal.

| Performance post-cannabis use         |                                                           |                                       |                          |                                       |                          |                                       |                                            |                          |                                       |                 |                          |                          |                    |
|---------------------------------------|-----------------------------------------------------------|---------------------------------------|--------------------------|---------------------------------------|--------------------------|---------------------------------------|--------------------------------------------|--------------------------|---------------------------------------|-----------------|--------------------------|--------------------------|--------------------|
|                                       | 1HR post-use<br>n (%)                                     | $\chi^2$<br>(p-value)<br>OR<br>95% CI | 3HRs post-use<br>n (%)   | $\chi^2$<br>(p-value)<br>OR<br>95% CI | 5HRs post-use<br>n (%)   | $\chi^2$<br>(p-value)<br>OR<br>95% CI | Cannabis-use<br>sessions combined<br>n (%) |                          | $\chi^2$<br>(p-value)<br>OR<br>95% CI |                 |                          |                          |                    |
| Performance at no cannabis use        | <b>OVERALL PERFORMANCE-RELATED CRASH RISK<sup>1</sup></b> |                                       |                          |                                       |                          |                                       |                                            |                          |                                       | a               | b                        |                          |                    |
|                                       |                                                           |                                       |                          |                                       |                          |                                       |                                            |                          |                                       | c               | d                        |                          |                    |
|                                       |                                                           | + crash<br>↓<br>accuracy              | ∅ crash<br>↑<br>accuracy |                                       | + crash<br>↓<br>accuracy | ∅ crash<br>↑<br>accuracy              |                                            | + crash<br>↓<br>accuracy | ∅ crash<br>↑<br>accuracy              |                 | + crash<br>↓<br>accuracy | ∅ crash<br>↑<br>accuracy |                    |
|                                       | + crash<br>↓<br>accuracy                                  | 0(0)                                  | 4(9.3)                   | 0.8<br>(p=0.4)                        | 2(4.6)                   | 2(4.6)                                | 3.6<br>(p=0.06)                            | 1(2.3)                   | 3(6.9)                                | 1.0<br>(p=0.3)  | 3(6.9)                   | 1 (2.3)                  | 13.2<br>(p=0.0003) |
|                                       | ∅ crash<br>↑<br>accuracy                                  | 7(16.3)                               | 32(74.4)                 | RR:1.2<br>1.1-1.4                     | 8(18.6)                  | 31(72.1)                              | 3.9<br>0.5-31.9                            | 6(13.9)                  | 33(76.7)                              | 1.8<br>0.2-20.7 | 16(37.2)                 | 23(53.4)                 | 4.3<br>0.4-45.3    |
|                                       | <b>SIMULATOR - CRASH RATE</b>                             |                                       |                          |                                       |                          |                                       |                                            |                          |                                       |                 |                          |                          |                    |
|                                       | <b>Obstacle avoidance – crash rate</b>                    |                                       |                          |                                       |                          |                                       |                                            |                          |                                       |                 |                          |                          |                    |
|                                       |                                                           | + crash                               | ∅ crash                  |                                       | + crash                  | ∅ crash                               |                                            | + crash                  | ∅ crash                               |                 | + crash                  | ∅ crash                  |                    |
|                                       | + crash                                                   | 14(32.5)                              | 6(13.9)                  | 0.4<br>(p=0.5)                        | 13(30.2)                 | 7(16.2)                               | 0.3<br>(p=0.6)                             | 12(27.9)                 | 8(18.6)                               | 0.1<br>(p=0.8)  | 17(39.5)                 | 3(6.9)                   | 5.4<br>(p=0.02)    |
|                                       | ∅ crash                                                   | 4(9.3)                                | 19(44.1)                 | 11.1<br>2.6-46.8                      | 5(11.6)                  | 18(41.8)                              | 6.7<br>1.7-25.8                            | 7(16.2)                  | 16(37.2)                              | 3.4<br>1.0-12.1 | 12(27.9)                 | 11(25.6)                 | 5.2<br>1.2-22.7    |
|                                       | <b>SIMULATOR – PERFORMANCE ACCURACY</b>                   |                                       |                          |                                       |                          |                                       |                                            |                          |                                       |                 |                          |                          |                    |
|                                       |                                                           | ↓                                     | ↑                        |                                       | ↓                        | ↑                                     |                                            | ↓                        | ↑                                     |                 | ↓                        | ↑                        |                    |
|                                       | <b>Obstacle avoidance – accuracy</b>                      |                                       |                          |                                       |                          |                                       |                                            |                          |                                       |                 |                          |                          |                    |
| ↓                                     | 5(11.6)                                                   | 6(13.9)                               | 1.5<br>(p=0.2)           | 7(16.3)                               | 4(9.3)                   | 0.8<br>(p=0.4)                        | 6(13.9)                                    | 5(11.6)                  | 0.7<br>(p=0.4)                        | 10(23.2)        | 1(2.3)                   | 16.2<br>(p<0.0001)       |                    |
| ↑                                     | 11(25.6)                                                  | 21(48.8)                              | 1.6<br>0.4-6.4           | 7(16.3)                               | 25(58.1)                 | 6.2<br>1.4-27.6                       | 8(18.6)                                    | 24(55.8)                 | 3.6<br>0.9-15.1                       | 19(44.1)        | 13(30.2)                 | 6.8<br>0.7-60.1          |                    |
| <b>Vigilance – accuracy</b>           |                                                           |                                       |                          |                                       |                          |                                       |                                            |                          |                                       |                 |                          |                          |                    |
| ↓                                     | 15(34.1)                                                  | 14(31.8)                              | 2.3<br>(p=0.1)           | 23(52.2)                              | 6(13.6)                  | 0.1<br>(p=0.8)                        | 21(47.7)                                   | 8(18.1)                  | 0.3<br>(p=0.6)                        | 27(61.3)        | 2(4.5)                   | 7.1<br>(p=0.008)         |                    |
| ↑                                     | 7(15.9)                                                   | 8(18.1)                               | 1.2<br>0.4-4.3           | 7(15.9)                               | 8(18.1)                  | 4.4<br>1.1-17.0                       | 6(13.6)                                    | 9(20.4)                  | 3.9<br>1.1-14.7                       | 12(27.3)        | 3(6.8)                   | 3.4<br>0.5-22.8          |                    |
| <b>Intersection crossing - safety</b> |                                                           |                                       |                          |                                       |                          |                                       |                                            |                          |                                       |                 |                          |                          |                    |
| ↓                                     | 9(20.4)                                                   | 9(20.4)                               | 0.2<br>(p=0.6)           | 11(25.0)                              | 7(15.9)                  | 0.06<br>(p=0.8)                       | 4(9.0)                                     | 14(31.8)                 | 0<br>(p>0.9)                          | 16(36.6)        | 2(4.5)                   | 12.8<br>(p=0.0003)       |                    |
| ↑                                     | 11(25)                                                    | 15(34.0)                              | 1.4<br>0.4-4.6           | 8(18.1)                               | 18(40.9)                 | 3.5<br>1.0-12.5                       | 14(31.8)                                   | 12(27.2)                 | 0.3<br>0.1-0.9                        | 18(40.9)        | 8(18.1)                  | 3.6<br>0.6-19.2          |                    |
