# Supplementary material
Source: PubMed Central journal article supplement (PMC6201734)
Supplement: supp_6.4.E453_2018-0164_original_submission.pdf [file supp_6.4.E453_2018-0164_original_submission.pdf]

1  
2  
3 Cannabis Use and Driving-Related Performance in Young  
4 Recreational Users: a within-subject randomized clinical study  
5  
6

7 OGOURTSOVA, Tatiana<sup>1</sup>, KALABA, Maja<sup>2</sup>, GELINAS, Isabelle<sup>1</sup>, KORNER-  
8 BITENSKY, Nicol<sup>1</sup>, & WARE, Mark A.<sup>2</sup>  
9

10  
11  
12  
13  
14  
15 <sup>1</sup> McGill University  
16 Faculty of Medicine,  
17 School of Physical and Occupational Therapy  
18

<sup>2</sup> Montreal General Hospital,  
McGill University Health Center  
(MUHC)  
19  
20  
21  
22

23 Corresponding author contact information:  
24 [tatiana.ogourtsova@mail.mcgill.ca](mailto:tatiana.ogourtsova@mail.mcgill.ca)  
25  
26  
27  
28

29 **Availability of data and material:** Please contact author for data request.  
30

31 **Funding:** This study was funded by the Canadian Automobile Association (CAA).  
32

33 **Authors contribution:** M.W., N.K.-B. & I.G. designed the study protocol. M.K.  
34 carried out the recruitment, data collection, and data analysis. T.O. carried out  
35 the data collection and data analysis. N.K.-B., M.K. and T.O developed the  
36 manuscript. All authors read and improved the manuscript. All authors approved  
37 the final manuscript.  
38  
39

40 **Acknowledgements:** The authors would like to acknowledge all study  
41 participants; Linda Ferguson (MGH, MUHC); Patricia McKinley (McGill  
42 University); The Assessor team (McGill University): Daniel Foster, Caroline  
43 Gregory, Mo Khang; the Center of Innovative Medicine Team (CIM): Kathleen  
44 Normandin, Jasmin Milan, Anissa Capilnean (RVH pharmacy), Carlos Guarin,  
45 Rami Tohme (Biomedical Management) and Lynda Cedar (CIM Director); the  
46 Virage Simulation team: William Langis and Francis Lareau; as well as Gevorg  
47 Chilingaryan (McGill University) for his assistance with statistical analyses.  
48  
49  
50  
51  
52  
53  
54  
55  
56  
57  
58  
59  
60

## ABSTRACT

**Introduction:** With cannabis legalization, young adults, a group already at high-risk for automobile crashes, may increase cannabis-use which may further increase crash-risk. We examined the effects of inhaled cannabis on driving-related performance in 18-to-24-year-old recreational users. **Methods:** In this within-subject, double-blind, randomized design, participants completed test sessions at no-cannabis state, 1, 3, and 5hrs post-cannabis. Performance was assessed with the Virage simulator and Useful Field of View (UFOV) tests. Self-reported perception of cannabis effects and driving ability/safety were measured. Repeated-measures ANOVA (cannabis effects and time post-use on performance); McNemar's Test (crash-risk [score combining complex simulator tasks] categorization); and, correlations/descriptive statistics (subjective perceptions and performance associations) were employed. **Results:** 180 sessions (n=45 participants) were completed. Significant effects of cannabis vs. no-use were noted on complex UFOV tasks at 3hrs (UFOV-2 ms: 70±24 vs. 37±12; CIs: 28-114 vs. 29-45,  $t=-2.98$  df=41  $p=0.004$ ; UFOV-3 ms: 102±66 vs. 64±; CI: 60-144 vs. 53-75,  $t=-2.42$ ,  $p=0.02$ ) and at 5hrs post-use (UFOV-3: 82±29 vs. 61±19, CI: 62-100 vs. 48-75,  $t=-2.32$ ,  $p=0.025$ ) when tasks were performed at the 1<sup>st</sup> test-session. Participants were significantly more likely to be classified as high-crash risk post vs. no-use (24 vs. 8.8%,  $\chi^2=3.87$  df=1,  $p=0.04$ , OR=0.42 CI: 0.14-1.30); and reported significantly lower driving ability/safety post vs. no-use. **Interpretation:** We found that among young recreational cannabis-users, while a regular dose of cannabis had no effect on simple and learned tasks, its use led to significant impairments on complex and novel driving-related tasks, and perceived driving ability/safety effects for up to 5hrs post-use.

## INTRODUCTION

Cannabis is the most commonly used illicit drug globally (1). Laws legalizing possession and use of cannabis for recreational purposes (2) may further increase its use. In a 2017 general population survey of 1838 current users in Canada, 36% answered “yes” when asked “*Will you consider using marijuana more often once it is legalized?*” (3). The lay public, health professionals and policy makers have raised concern about the impact of changes in cannabis legislation on road safety. This concern is especially pronounced for young drivers who are already known to be at high risk of crashes and who are also the age-group most likely to use cannabis (4).

The literature on the effect of cannabis on driving, primarily in healthy subjects who are either first time or recreational users, suggests there is an impact on different driving-related functions: increased brake and choice reaction time, impaired lane position, headway and dynamic tracking, distortion of time perception, reduced divided/sustained attention (5-9), and increased caution (10). What is less clear given the current research is the time post-cannabis when the deficits in driving-related function subside. Indeed, a recent publication of the research gaps related to cannabis and driving from the United States, suggest insufficient knowledge related to time from consumption to driving safely (5). Given the evidence gaps, the present study aimed to answer two questions: In young recreational cannabis users: 1) to what extent (and for how long) is driving-related performance compromised following a usual dose of inhaled cannabis? and, 2) are there associations between self-reported perceptions (drug effect, driving ability/safety) and performance?

## MATERIALS & METHODS

### *Design/setting*

A ‘within subject’, double-blind (assessors blind to cannabis status of the participants; participants blinded to the randomization sequence), randomized design, where participants acted as their own controls, was used. The study took place at the Center for Innovative Medicine, McGill University Health Center, Montreal, QC, Canada. Ethics approval was obtained from McGill University Ethics Review Board (REB#2018-4138).

### *Population*

The target population was young adult recreational cannabis users aged 18-to-24 years. Participants were eligible if they: were current recreational users as indicated by cannabis use at least once within the past three months; held a valid drivers’ license and had driven in the past three months; had sufficient comprehension of English or French; had sufficient cognitive ability to understand

1  
2  
3 task requirements as determined by initial phone-interview; provided informed  
4 consent; and, had a personal-use cellphone. Participants needed to agree to  
5 abstain from cannabis and other illicit drugs for 48hrs prior to each testing day  
6 and to provide availability to attend four testing sessions over a 4-to-6 weeks  
7 period. Exclusion criteria were: upper and/or lower limb motor and/or sensory  
8 deficit(s) precluding simulator/computer use; health conditions (including seizure  
9 disorders) that may be triggered by simulator/computer use; conditions/new  
10 medications that may lead to health-status fluctuations and decrease test-retest  
11 stability; pregnancy; and, participation in another cannabis-related study.  
12  
13

14 Appendix 1 describes sample size calculations. Participants were recruited  
15 through an online social media campaign. Those completing a preliminary  
16 eligibility screen and indicating an interest were contacted by the coordinator,  
17 who explained study's purpose/procedures, determined eligibility, and scheduled  
18 the 1<sup>st</sup> session following verbal agreement.  
19  
20

### 21 **Procedures**

22  
23 Each consenting participant was randomised (without stratification, in blocks of 8)  
24 to one of 4 sequences on Day 1 (**D1**). The randomization sequence was revealed  
25 in front of the participant by opening an opaque, numbered, sealed envelope.  
26 Participants were blind to their sequence; they only knew that they were being  
27 tested at different times on different days. Each underwent evaluation on 4  
28 separate days over a 4-week period according to their assigned sequence:  
29  
30

31  
32 **Sequence\_1:** D1 = no cannabis (NO)→D2 = 1hr-post→D3 = 3hrs→ D = 5hrs;

33 **Sequence\_2:** D1 = 3hrs→D2 = NO→D3 = 5hrs→ D4 = 1hr;

34 **Sequence\_3:** D1 = 1hr→D2 = 5hrs→D3 = NO→ D4 = 3hrs;

35 **Sequence\_4:** D1 = 5hrs→D2 = 3hrs→D3 = 1hr→ D4 =NO;  
36  
37

38 The timepoints were chosen given the substantial scientific evidence [11] that  
39 delaying driving for at least 6hrs after use of a typical dose allows resolution or  
40 near resolution of impairments in those who are recreational users. Driving-  
41 related tasks order presentation (UFOV/simulator) was also randomly  
42 counterbalanced within sequence, such that half of the participants began with  
43 the UFOV. Within participants, this order remained constant.  
44  
45

46 For all sessions, participants were instructed to continue use of routinely taken  
47 medications (if any), and to refrain from smoking cannabis and using other illicit  
48 drugs and alcohol for a minimum of 48hrs prior each session. A urine sample  
49 was collected to verify adherence. For female participants, a urine pregnancy test  
50 was administered. Health-related changes since previous session were inquired  
51 on and further information was collected if present. We proceeded with cannabis  
52 administration and driving-related testing only if all results were negative and no  
53 health-related changes reported.  
54  
55  
56  
57  
58  
59  
60

1  
2  
3 On Day 1, once the participant had signed the consent form, the following  
4 information was collected: basic socio-demographic characteristics (age, gender,  
5 education); driving and cannabis-use behaviors. At each testing-session,  
6 participant's adherence with the study protocol (questions regarding drug use,  
7 urine test, pregnancy test) was verified. After the randomization schedule  
8 revealed the procedure for the day, the identified sequence began.  
9

10  
11 On days when the participant was slated to cannabis-use, the following  
12 procedure was followed. In a room with a ventilation system designed specifically  
13 for cannabis consumption via inhalation, a standard 100mg dose of dried  
14 granulated *Cannabis sativa flowers* was placed into a vaporizer set at 200°C  
15 (Mighty Medic, Storz & Bickel GmbH) licensed for medical administration of  
16 cannabis in Canada (2016-01-22 Licence No. 96431). The participant was  
17 instructed to inhale for 5s, hold their breath for 10s, and wait approximately 45s  
18 between inhalations; repeated for 5 inhalations. Research-grade herbal  
19 cannabis, with standardized levels of  $12.9 \pm 2.8\%$  tetrahydrocannabinol (THC)  
20 and  $<1\%$  cannabidiol (CBD) (Canopy Growth Corporation, reflecting an average  
21 street-grade recreational cannabis THC levels (2)) was prepared by the hospital  
22 pharmacy and used. A Clinical Trial Application 'no objection letter' was received  
23 from the Therapeutic Products Directorate of Health Canada for the study.  
24  
25

26  
27 On all sessions, 10mins post-use or no-use, participant completed questions  
28 regarding: self-perceived driving ability and safety; and, perceived drug effect.  
29 Following the randomly-allocated wait times (1, 3, or 5 hours) or immediately (if  
30 they were in a no-cannabis session), the participant underwent the driving-  
31 related testing. The coordinator accompanied him/her to the testing room  
32 housing the UFOV and simulator. The assessor proceeded with the UFOV or  
33 simulator, as instructed by the coordinator. For all test-sessions, standardized  
34 instructions in French or English and clarifications (as per preference) were  
35 provided. Practice trials were performed on each test ensuring participant's  
36 understanding of task expectations. During wait times post-use to assessment,  
37 participants remained in a private room adjacent to the coordinator's desk and  
38 were able to order meals/snacks; listen to music or watch movies (video-games  
39 were prohibited).  
40  
41  
42

43 3 UFOV and 7 simulator tasks were completed (45-to-60-minute period). Breaks  
44 were introduced as needed. The order of the 7 simulator and 3 UFOV tasks was  
45 kept constant over all test-sessions. In-between UFOV and simulator  
46 evaluations, the participant was again asked the questions related to perceived  
47 driving ability, driving safety, and perceived "high". All assessors had health-care  
48 backgrounds and were trained in driving-related tests administration using  
49 standard procedures. Each was blind to the randomization schedule and efforts  
50 were made to randomize participants across assessors to reduce the likelihood  
51 of any one assessor seeing the same participant repeatedly.  
52  
53

## 54 **Measures**

55  
56  
57  
58  
59  
60

## UFOV Test

The UFOV Test [19] measures Useful Field of View, a function that, when reduced, has strong criterion validity in predicting high-crash risk (12). UFOV, defined as the visual field in which information can be acquired and processed, is measured via 3 tasks. Stimulus presentation varies from a very slow-350ms to an extremely rapid-17ms (i.e. best possible result). In UFOV-1, a *simple processing speed task*, the participant is asked to identify a centrally located object (car or truck). In UFOV-2, a *more complex divided attention task*, the participant is again asked to identify whether the centrally presented target is a car/truck as well as to identify the location of a simultaneously presented peripheral target, again at different time exposures. The final and *most complex task selective attention*, UFOV-3, provides a measure of distractibility by presenting the same task as the UFOV-2, this time with distractors on the screen. The UFOV provides results in ms for each task, indicating the time of the stimulus presentation at which the participant is most successful/providing accurate responses.

## The Virage Driving Simulator-VS500M

This simulator includes: 3x55-inch LCD high resolution 1920x1080 pixels screens, providing 180-degree front views; 2 lateral screens positioned in the back, providing blind spots and three mirrors visualization; driving cabin, equipped with automatic transmission and controls (steering wheel, pedals, dashboard) mounted on a motion/vibration system simulating acceleration, braking, pavement-type, and collision effects; and, a surround-sound system, providing realistic engine sounds adjusted to various road scenarios (17). The 7 subtests measure: braking reaction time; steering reaction time; braking vs. steering in combined reaction time and decision accuracy; lane deviation; crossing intersection safety/crash-rate/duration; vigilance accuracy/duration; and obstacle avoidance accuracy/crash-rate (18). For the 3 out of 7 more complex tasks: intersection crossing, vigilance challenge and obstacle avoidance – performances were dichotomized into maximal (100%) vs. submaximal scores (<100%). Crash-risk was operationally defined as combined submaximal score performances on these tasks: intersection crossing accuracy (<100%); obstacle avoidance (crash rate >0% and accuracy <100%); and, vigilance challenge accuracy (<100%). This new variable further dichotomized participants into low vs. high risk. While the predictive validity of the simulator is less well documented than the UFOV, it was chosen given the evidence that simulators are associated with on-road driving, its strong face validity, and the ability to test crash-risk (19, 20).

## Statistical Analyses

Statistical analyses were performed using SAS 9.4 (SAS Institute Inc). For



normally-distributed data, a 4\*4 *repeated measures ANOVA* (21) with session sequence (1/2/3/4) and cannabis status (no-use/1/3/5hrs post-use) as within-subject factors was used to determine the effects of cannabis and time since use on performance. Effects of cannabis status and sequence as well as their interaction were noted and in cases of significant interaction, pre-determined pairwise comparisons were further conducted with *paired t-tests* (22). Within-subject differences in the proportion of optimal vs. suboptimal complex simulator performances and risk categorization by cannabis status were examined using *McNemar's test for matched pairs* (23). Correlations and descriptive statistics were used to explore the associations between perceived subjective reports with driving-related performance.

## RESULTS

A total of 191 individuals responded to the social media recruitment and of these, 126 met preliminary eligibility. The first 91 were phone-contacted by the coordinator: 53 were deemed eligible following full eligibility screening. 48 agreed to participate, attended the first session, and signed the informed-consent form. Of these, 45 (94%) completed the study protocol (Figure 1). Table 1 outlines participants' demographics, driving behavior and cannabis use. Unless otherwise indicated, results are presented based on these 45 enrolled subjects: 47% females, mean age of 20.6±1.3 years.

At each cannabis-use session, when asked whether the "high" they were experiencing was the *same* or *different* from usual at 10mins post-use: 56% at 1hr; 62% at 3hrs; and, 67% at 5hrs reported *same*. *Different* from usual reports across cannabis-use sessions were as follows: *less* (22, 17.7, 15.5%), *more* (6.6, 8.8, 6.6%), *other* – i.e. head high, body high, tired (15.5, 11.1, 11.1%).

### ***Driving-related performances and self-reports of safety/ability***

**UFOV-1/simplest processing speed:** In 91% of all sessions (164/180), regardless of cannabis status, performance was at the maximum best level possible (in ms): *at no cannabis* 17±0; *at 1hr post-use* 17.67±3.16 CI 16.88-18.46; *at 3hrs post-use* 17.31±2.09 CI: 16.79-17.83; and *at 5hrs post-use* 17±0. Effects of sequence, cannabis status and the interaction of sequence\*cannabis status were found to be non-significant ( $\chi^2=2.08/2.10/2.10$  respectively;  $df=3/3/5$ ;  $p=0.55/0.55/0.83$ ).

**UFOV-2/more complex selective attention:** Effects of sequence and cannabis status were both non-significant ( $F=2.34/0.10$   $df=3$ ,  $p=0.0876$  / 0.9584). However, there was a significant interaction of sequence\*cannabis status ( $F=3.72$   $df=9$ ;  $p=0.001$ ) (Figure 1). Subsequent pairwise comparisons revealed significantly worse UFOV-2 scores (in ms) **3hrs post-use** vs. no-use when testing was performed at the participant's 1<sup>st</sup> session - i.e. the task was unfamiliar: 70±24 vs. 37±12; CIs: 28-114 vs. 29-45,  $t=-2.98$   $df=41$   $p=0.0048$ .

1  
2  
3  
4 **UFOV-3/highest complexity divided attention:** Effects of sequence and  
5 cannabis status both were found to be non-significant ( $F=0.31/0.39$   $df=3$ ,  
6  $p=0.8163/0.7600$ ). However, a significant interaction of sequence\*cannabis  
7 status was found ( $F=4.58$   $df=9$ ,  $p=0.0001$ ). Pairwise comparisons revealed  
8 significantly worse UFOV-3 scores (in ms) **3hrs post-use** vs. no-use when  
9 testing was performed at the participant's 1<sup>st</sup> session - i.e. the task was  
10 unfamiliar:  $102\pm66$  vs.  $64\pm18$  CI: 60-144 vs. 53-75,  $t=-2.42$   $df=41$ ,  $p=0.0203$ .  
11 Reduced scores were also found at **5hrs** when it was the participant's 1<sup>st</sup>  
12 session:  $82\pm29$  vs.  $61\pm19$  CI: 62-100 vs. 48-75,  $t=-2.32$   $df=41$ ,  $p=0.0256$ . The  
13 same pattern was noted at **1hr** ( $73\pm28$  vs.  $61\pm25$  CI: 54-92 vs. 43-77), but only  
14 approached significance ( $t=-1.46$   $df=41$   $p=0.14$ ).  
15  
16  
17

18 **Simulator:** Responses on the simplest simulator tasks (braking, steering, lane  
19 keeping speed control) did not reveal significant differences in cannabis  
20 (combining all post-cannabis states) vs. non-cannabis performance:  
21 ( $F=1.15/1.33/0.61$   $df=122$ , braking  $p=0.36$ ; steering  $p=0.28$ ; lane keeping speed  
22 control  $p=0.77$ ). The interaction for the more complex task of intersection-  
23 crossing (safe-crosses) approached but was not significant ( $F=1.71$   $df=9$ ,  
24  $p=0.14$ ). Interactions for vigilance challenge accuracy ( $F=0.99$   $df=9$ ,  $p=0.47$ ),  
25 obstacle avoidance accuracy ( $F=0.77$   $df=9$ ,  $p=0.64$ ), and obstacle avoidance  
26 crash-rates ( $F=1.51$   $df=9$ ,  $p=0.21$ ) were non-significant. However, when  
27 dichotomizing performances on these more complex simulator tasks into  
28 **maximal** vs. **submaximal** score (100 vs. <100%), participants were significantly  
29 more likely to be classified in the **submaximal** category at all post-cannabis use  
30 time-points combined, on all but one measure (obstacle avoidance accuracy)  
31 (Table 2). Furthermore, participants were significantly more likely to be classified  
32 as **high** crash risk at all post-cannabis use times combined vs. no cannabis  
33 (24.13% vs. 8.88%,  $\chi^2=3.87$   $df=1$ ,  $p=0.04$ , OR=0.42 CI: 0.14-1.30).  
34  
35  
36  
37

38 Perceived driving ability (worse/same/better vs. usual), when combined for the 3  
39 timepoints at 10mins post-cannabis use revealed 50% “worse” and 49% “same”,  
40 and 0% “better”. Self-perceived driving safety differed significantly according to  
41 cannabis state ( $F=26.01$ ,  $df=3$ ,  $p<0.0001$ ), such that at 1, 3, and 5 hours post-  
42 cannabis use – 96%, 89%, and 79%, respectively, scored themselves less safe  
43 to drive compared to the no-cannabis state.  
44  
45

46 No significant associations were found between the UFOV driving-related  
47 performance and perceived driving safety and ability on the VAS (Table 3). No  
48 significant differences were found for UFOV performances according to the  
49 various perceived “high” (i.e. same, less, more, other): UFOV-2 at 1hr/3hrs/5hrs  
50 post-use ( $F=0.13/2.70/1.81$ ,  $df=3$ ,  $p=0.94$ , 0.06, 0.15); UFOV-3  
51 ( $F=0.12/0.35/2.60$ ,  $df=3$ ,  $p=0.94$ , 0.79, 0.06).  
52  
53

54 Participants classified as **high** crash risk were significantly more likely to indicate  
55 “worse” vs. usual ability at all post-cannabis use times combined (68% vs. 32%,  
56  
57  
58  
59  
60



1  
2  
3  $\chi^2= 7.40$   $df=1$ ,  $p=0.0065$ ,  $OR=0.93$   $CI: 0.36-3.25$ ).

## 4 5 6 **INTERPRETATION**

7  
8 This study was designed to describe the effects of a standard dose of  
9 inhaled cannabis on driving-related performance in young recreational users at 1,  
10 3, and 5 hours after use compared to when they performed these same  
11 tasks without cannabis. Three major findings are reported. First, complex driving-  
12 related performance is affected at 3hrs and 5hrs post-use such that young  
13 drivers are slower to accurately respond when divided attention is required, or  
14 distractors are present, and when the stimuli are novel - i.e. they have not  
15 experienced the task requirements previously. Second, on the simulator, an  
16 individual's crash risk on complex driving tasks was higher post-use versus when  
17 they were in a no-cannabis state. Third, self-reported perceptions (driving  
18 ability/safety) demonstrated that young recreational users did not find themselves  
19 to be as safe to drive in a cannabis state compared to their usual safety and  
20 ability, even 5hrs after use.  
21  
22

23  
24 The measures used in the current study provide important indicators. For  
25 instance, the ceiling effect of the UFOV-1, the simplest UFOV task, is important.  
26 This suggest that participants gave their best effort at all sessions. This finding is  
27 important given the likelihood of a response bias in which participants would  
28 potentially have tried to perform more poorly in a cannabis state if they held the  
29 belief that cannabis use did not influence driving safety. Participants were  
30 particularly challenged when the tasks were novel and complex (i.e. when  
31 presented at the 1<sup>st</sup> session in a cannabis state). In young (20) and older adults  
32 (11, 24), UFOV has repeatedly been shown to be a strong predictor of crash  
33 rates and overall safety. In the current study, it was useful as a discriminative  
34 measure. Future applications for such discrimination ability deserve further  
35 research.  
36  
37

38  
39 The study has limitations. As healthy young recreational users were studied, its  
40 results cannot be extrapolated to daily and chronic users, nor to those with health  
41 conditions for which medicinal cannabis is prescribed. In addition, driving-  
42 related response times and reactions to novel stimuli are different in young  
43 versus older individuals (16), suggesting that the differences reported here might  
44 be more pronounced in older cannabis users. Subsequent studies should explore  
45 these hypotheses. Further, once cannabis use is legalized, investigating its  
46 effects on other driving outcomes that were not possible in current study (e.g. on-  
47 road performance) is warranted. In conclusion, we found that among young  
48 recreational cannabis-users, while a regular dose of cannabis had no effect on  
49 simple and learned tasks, its use led to significant impairments on complex and  
50 novel driving-related tasks, and perceived driving ability/safety effects for up to  
51 5hrs post-use.  
52  
53  
54  
55  
56  
57  
58  
59  
60

## REFERENCES

1. World\_Health\_Organization. The health and social effects of nonmedical cannabis use. 2018.
2. Government\_of\_Canada. Cannabis Act (S.C. 2018, c. 16). In: Acts JLC, editor. Canada2018.
3. CAA. Canadian Automobile Association survey results on cannabis use in Canada. In: team R, editor. 2017.
4. Statistics\_Canada. Health Reports: Prevalence and correlates of marijuana use in Canada, 2012. Health Matters. 2015. p. 10-5.
5. Capler R, Bilsker D, Van Pelt K, MacPherson D. CANNABIS USE AND DRIVING: Evidence Review. In: University CDPCCSF, editor. 2017.
6. Ramaekers JG, Moeller MR, van Ruitenbeek P, Theunissen EL, Schneider E, Kauert G. Cognition and motor control as a function of Delta9-THC concentration in serum and oral fluid: limits of impairment. *Drug Alcohol Depend.* 2006;85(2):114-22.
7. Riedel G, Davies SN. Cannabinoid function in learning, memory and plasticity. *Handb Exp Pharmacol.* 2005(168):445-77.
8. Watson TM, Mann RE. International approaches to driving under the influence of cannabis: A review of evidence on impact. *Drug Alcohol Depend.* 2016;169:148-55.
9. Anderson BM, Rizzo M, Block RI, Pearlson GD, O'Leary DS. Sex, drugs, and cognition: effects of marijuana. *J Psychoactive Drugs.* 2010;42(4):413-24.
10. Ramaekers J, Berghaus G, van Laar M, Drummer O. Dose related risk of motor vehicle crashes after cannabis use. *Drug and alcohol dependence.* 2004;73(2):109-19.
11. Ball K, Owsley C. The useful field of view test: a new technique for evaluating age-related declines in visual function. *J Am Optom Assoc.* 1993;64(1):71-9.
12. Goode K, Ball K, Sloane M, Roenker D, Roth D, Myers R, et al. Useful Field of View and other Neurocognitive Indicators of Crash Risk in older Adults. *Journal of Clinical Psychology in Medical Settings.* 1998;5(4):425-40.
13. Mazer B, Sofer S, Korner-Bitensky N, Gelinias I. Use of UFOV to evaluate and retrain visual attention skills in clients with stroke. *American Journal of Occupational Therapy.* 2001;55:552-7.
14. Owsley C, Ball K, Sloane ME, Roenker DL, Bruni JR. Visual/cognitive correlates of vehicle accidents in older drivers. *Psychol Aging.* 1991;6(3):403-15.
15. Owsley C, Ball K, McGwin G, Sloane ME, Roenker DL, White MF, et al. Visual Processing Impairment and Risk of Motor Vehicle Crash Among Older Adults. *Journal of American Medical Association.* 1998;279(14):1083-5.
16. Sekuler AB, Bennett PJ, Mamelak M. Effects of aging on the useful field of view. *Exp Aging Res.* 2000;26(2):103-20.

- 1
  - 2
  - 3
  - 4
  - 5
  - 6
  - 7
  - 8
  - 9
  - 10
  - 11
  - 12
  - 13
  - 14
  - 15
  - 16
  - 17
  - 18
  - 19
  - 20
  - 21
  - 22
  - 23
  - 24
  - 25
  - 26
  - 27
  - 28
  - 29
  - 30
  - 31
  - 32
  - 33
  - 34
  - 35
  - 36
  - 37
  - 38
  - 39
  - 40
  - 41
  - 42
  - 43
  - 44
  - 45
  - 46
  - 47
  - 48
  - 49
  - 50
  - 51
  - 52
  - 53
  - 54
  - 55
  - 56
  - 57
  - 58
  - 59
  - 60
17. Virage\_Simulation\_Inc. Virage Simulation Canada2005-2018 [cited 2018 August 23rd]. Available from: <https://viragesimulation.com/>.
18. Singh H, Barbour BM, Cox D. Driving Rehabilitation as Delivered by Driving Simulation In: Fisher DL, Rizzo M, Caird J, Lee JD, editors. Handbook of Driving Simulation for Engineering, Medicine and Psychology2011.
19. Hartman RL, Brown TL, Milavetz G, Spurgin A, Pierce RS, Gorelick DA, et al. Cannabis effects on driving lateral control with and without alcohol. Drug Alcohol Depend. 2015;154:25-37.
20. McManus B, Cox MK, Vance DE, Stavrinou D. Predicting Motor Vehicle Collisions in a Driving Simulator in Young Adults Using the Useful Field of View Assessment. Traffic Inj Prev. 2015;16(8):818-23.
21. Gueorguieva R, Krystal JH. Move over ANOVA: progress in analyzing repeated-measures data and its reflection in papers published in the Archives of General Psychiatry. Arch Gen Psychiatry. 2004;61(3):310-7.
22. Rice JA. Mathematical Statistics and Data Analysis. 3 ed: Duxbury Advanced; 2006.
23. McNemar Q. Note on the sampling error of the difference between correlated proportions or percentages. Psychometrika. 1947;12(2):153-7.
24. Clay OJ, Wadley VG, Edwards JD, Roth DL, Roenker DL, Ball KK. Cumulative meta-analysis of the relationship between useful field of view and driving performance in older adults: current and future implications. Optom Vis Sci. 2005;82(8):724-31.

1  
2  
3 **Appendix 1**  
4

5 **Sample size calculations:** Sample size calculations were based on the main  
6 outcome of interest, performance on driving related measures: UFOV-2 and  
7 UFOV-3 (11). A sample of 36 participants was estimated to provide 95% power  
8 to detect differences of 40 msec (an outcome that is of clinical importance to safe  
9 driving (12-16) in the within-person scores under the different testing conditions  
10 (i.e. time since cannabis use/no cannabis). Given an anticipated dropout rate of  
11 15% to 20%, and to permit sub-group analyses, we aimed to enrol 50  
12 participants.  
13  
14  
15  
16  
17  
18  
19  
20  
21  
22  
23  
24  
25  
26  
27  
28  
29  
30  
31  
32  
33  
34  
35  
36  
37  
38  
39  
40  
41  
42  
43  
44  
45  
46  
47  
48  
49  
50  
51  
52  
53  
54  
55  
56  
57  
58  
59  
60

Confidential

**TABLE 1** Study participants: demographics, driving experience and cannabis exposure

|                              | Sample Size (n) | Percentage (%) | Mean      |
|------------------------------|-----------------|----------------|-----------|
| <b>Demographic variables</b> |                 |                |           |
| <b>Gender</b>                |                 |                |           |
| Male                         | 24              | 53 %           | -         |
| Female                       | 21              | 47 %           | -         |
| <b>Age</b>                   |                 |                |           |
| 18-20                        | 22              | 48%            | 20.6 ±1.3 |
| 21-24                        | 23              | 52%            |           |
| <b>Education completed</b>   |                 |                |           |
| High School                  | 24              | 53.3%          | -         |
| CEGEP/University             | 21              | 46.6%          | -         |
| <b>Driving experience</b>    |                 |                |           |
| 1-3 years                    | 11              | 24.4 %         | -         |
| 4-6 years                    | 27              | 60.0 %         | -         |
| >6 years                     | 7               | 15.5 %         | -         |
| <b>Driving frequency</b>     |                 |                |           |
| Daily/weekly                 | 28              | 62.2 %         | -         |
| Monthly                      | 11              | 24.4%          | -         |
| Variable                     | 6               | 13.3 %         | -         |
| <b>Cannabis use</b>          |                 |                |           |
| Weekly                       | 17              | 38%            | -         |
| Monthly                      | 20              | 44%            | -         |
| Variable                     | 8               | 18%            | -         |

**TABLE 2** Maximal vs. submaximal score performances on the complex Simulator tasks according to cannabis status

|                                                                | No-cannabis use | Post-cannabis use | McNemar Test & significance  | Odds Ratio | 95% CI     |
|----------------------------------------------------------------|-----------------|-------------------|------------------------------|------------|------------|
| <b>Vigilance accuracy (higher is better)</b>                   |                 |                   |                              |            |            |
| = 100%<br>(70 test sessions)                                   | 16 (35.5%)      | 54 (37.24%)       | 43.55, df=1,<br>$p < 0.0001$ | 1.20       | 0.59-2.43  |
| < 100%<br>(110 test sessions)                                  | 29 (64.4%)      | 81 (62.75%)       |                              |            |            |
| <b>Obstacle avoidance accuracy (higher is better)</b>          |                 |                   |                              |            |            |
| =100%<br>(122 test sessions)                                   | 34 (75.56%)     | 88 (60.68%)       | 2.08 df=1,<br>$p = 0.14$     | 0.60       | 0.28-1.30  |
| <100%<br>(58 test sessions)                                    | 11 (24.44%)     | 47 (39.31%)       |                              |            |            |
| <b>Obstacle avoidance – crash rate (less is better)</b>        |                 |                   |                              |            |            |
| = 100%<br>(13 test sessions)                                   | 2 (4.44%)       | 11 (24.44%)       | 118.12 df=1,<br>$p < 0.0001$ | 1.90       | 0.40-8.95  |
| < 100 %<br>(167 test sessions)                                 | 43 (95.55%)     | 124 (75.55%)      |                              |            |            |
| <b>Intersection crossing – safe crosses (higher is better)</b> |                 |                   |                              |            |            |
| =100%<br>(11 test sessions)                                    | 1 (2.22%)       | 10 (6.89%)        | 122.03 df=1,<br>$p < 0.0001$ | 3.52       | 0.43-28.29 |
| <100%<br>(169 test sessions)                                   | 44 (97.77%)     | 125 (93.10%)      |                              |            |            |
| <b>Intersection crossing – unsafe crosses (less in better)</b> |                 |                   |                              |            |            |
| =0%<br>(21 test sessions)                                      | 6 (4.13%)       | 15 (10.34%)       | 103.14 df=1,<br>$p < 0.0001$ | 0.81       | 0.29-2.23  |
| >0%<br>(159 test sessions)                                     | 39 (95.86%)     | 120 (89.65%)      |                              |            |            |
| <b>Crash risk (low vs. high)</b>                               |                 |                   |                              |            |            |
| Low<br>(151 test sessions)                                     | 41 (91.11%)     | 110 (75.86%)      | 3.87 df=1,<br>$p = 0.0489$   | 0.42       | 0.14-1.30  |
| High<br>(29 test sessions)                                     | 4 (8.88%)       | 25 (24.13%)       |                              |            |            |

**TABLE 2 LEGEND:** Green vs. pink slots indicate optimal vs. suboptimal performances. Crash risk combines the following outcome variables: Safe crosses <100% & Obstacle avoidance crash rate >0% & Vigilance accuracy <100% & Obstacle avoidance accuracy <100%. CI: confidence interval; Post-cannabis use combines performances at 1, 3, and 5hrs post-use.



**TABLE 3** Correlations between UFOV driving-related performance and perceived driving ability/safety

| VAS measure               | UFOV2                     | UFOV3      |
|---------------------------|---------------------------|------------|
|                           | No cannabis use           |            |
| Perceived driving ability | r=0.13, NS                | 0.18, NS   |
| Perceived driving safety  | r=0.06, NS                | 0.18, NS   |
|                           | At 1hr post cannabis use  |            |
| Perceived driving ability | r=-0.12, NS               | -0.09, NS  |
| Perceived driving safety  | -0.11, NS                 | -0.12, NS  |
|                           | At 3hrs post cannabis use |            |
| Perceived driving ability | 0.08, NS                  | -0.006, NS |
| Perceived driving safety  | 0.11, NS                  | 0.02, NS   |
|                           | At 5hrs post cannabis use |            |
| Perceived driving ability | <b>r=-0.40, p=0.0056</b>  | -0.005, NS |
| Perceived driving safety  | <b>r=-0.38, p=0.0094</b>  | -0.05, NS  |

Confidential

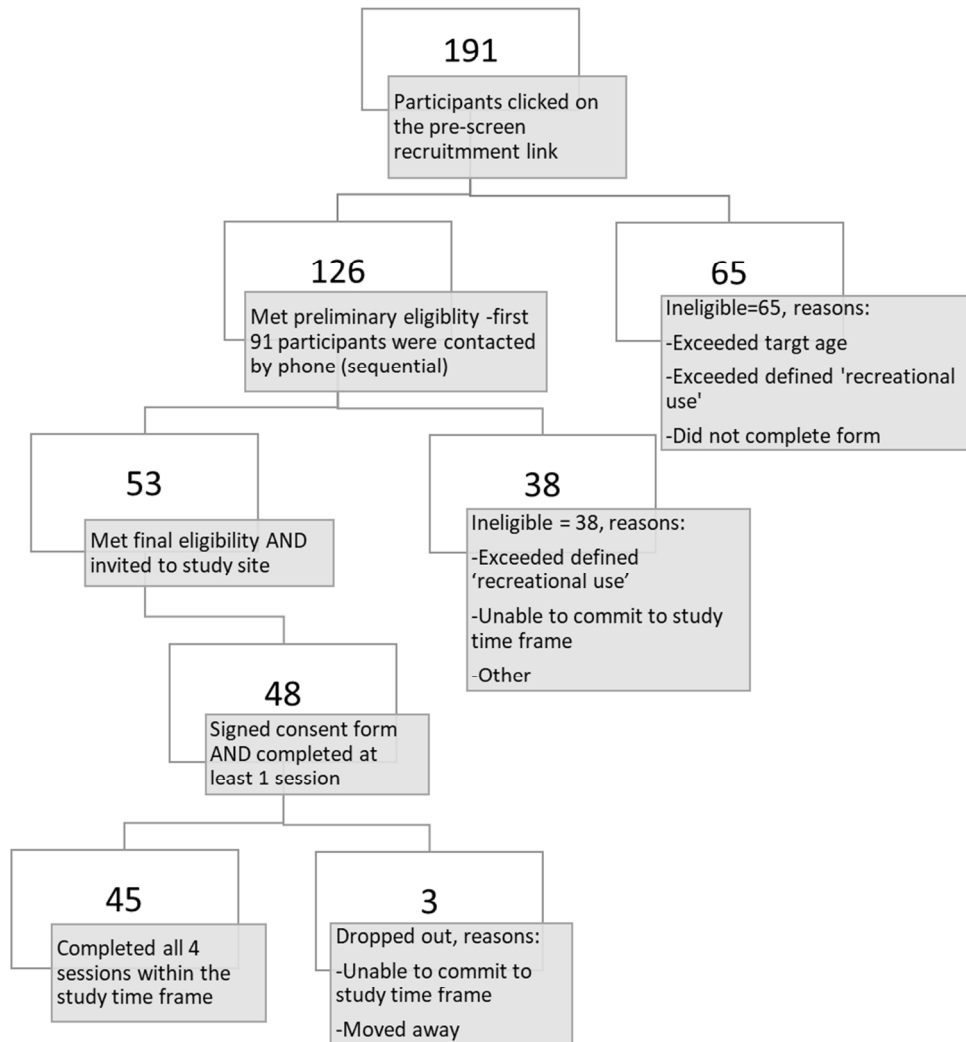

Figure 1. CONSORT diagram

86x97mm (300 x 300 DPI)

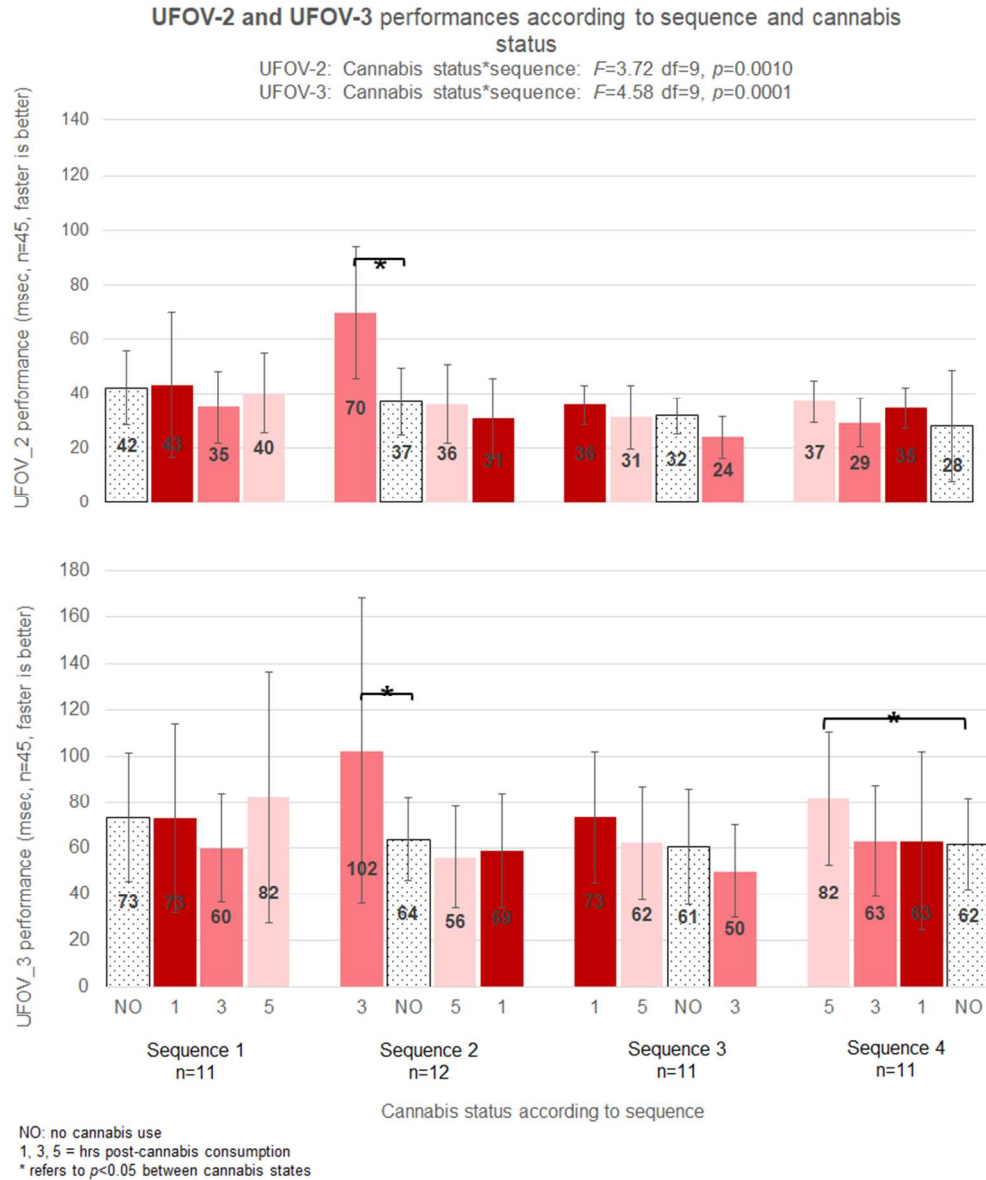

Figure 2. Results of UFOV-2 and UFOV-3 according to sequence and cannabis status. † FIGURE 2 LEGEND: UFOV-2 and UFOV-3 performances (msec, faster is better) at 1, 3 and 5hrs post cannabis use and according to the allocated sequence. UFOV-2: Significant sequence x cannabis state interaction ( $F=3.72$ ,  $df=9$ ,  $p=0.001$ ) was found; pairwise comparisons showed a significantly worse performance at 3hrs post cannabis consumption vs. no cannabis use ( $t= -2.98$ ;  $df=41$ ;  $p=0.0048$ ). UFOV-3: Significant sequence x cannabis state interaction ( $F=4.58$ ,  $df=9$ ,  $p=0.0001$ ) was found; pairwise comparisons showed a significantly worse performance at 3hrs post cannabis consumption vs. no cannabis use ( $t= -2.98$ ;  $df=41$ ;  $p=0.0203$ ) and at 5hrs post-use vs. no use ( $t=-2.32$ ;  $df=41$   $p=0$ )

91x108mm (240 x 240 DPI)
